# Supplementary material for: Impact of methane and other precursor emission reductions on surface ozone in Europe: Scenario analysis using the EMEP MSC-W model
Source: Copernicus journal article supplement (doi:10.5194/egusphere-2024-1422), 2024-06-03
Supplement: Supplementary file 1 [file egusphere-2024-1422-supplement.pdf]

# **Supplement of “Impact of methane and other precursor emission reductions on surface ozone in Europe: Scenario analysis using the EMEP MSC-W model”**

Willem E. van Caspel *et al.*

**Correspondence:** Willem van Caspel (willemvc@met.no)

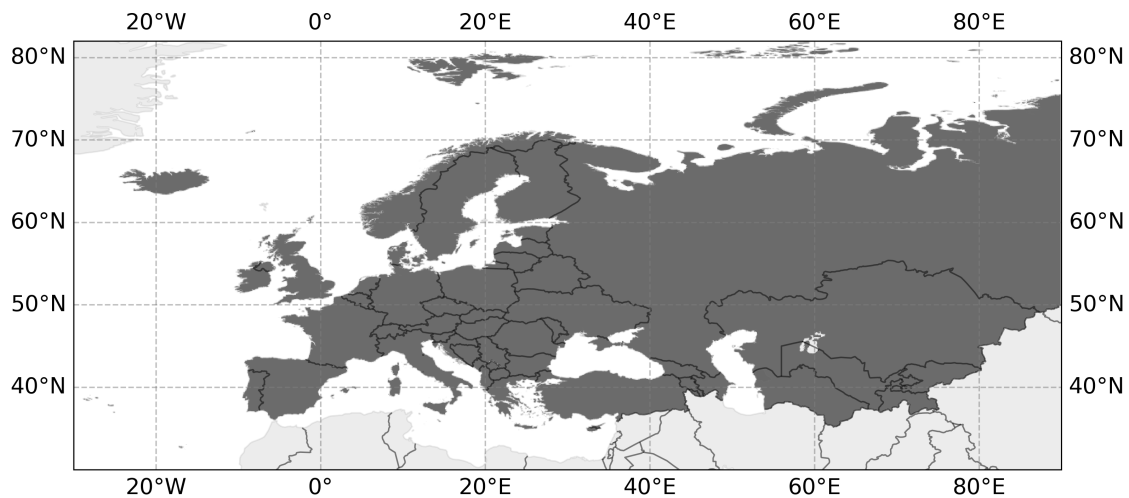

**Figure S1.** Dark-grey shaded region marks the EMEP region within the  $0.1^\circ \times 0.1^\circ$  regional EMEP modelling domain.

**Table S1.** 600-ensemble mean global mean  $\text{CH}_4$  concentrations calculated using the MAGICC7 model for the emission scenarios described in Sect. 3 of the main text.

| Year                        | 2015 | 2020 | 2025 | 2030 | 2035 | 2040 | 2045 | 2050 |
|-----------------------------|------|------|------|------|------|------|------|------|
| CLE $\text{CH}_4$ (ppb)     | 1842 | 1897 | 1956 | 2016 | 2073 | 2129 | 2185 | 2236 |
| MFR $\text{CH}_4$ (ppb)     | 1842 | 1897 | 1956 | 1936 | 1824 | 1750 | 1700 | 1651 |
| LOW $\text{CH}_4$ (ppb)     | 1842 | 1897 | 1955 | 1928 | 1801 | 1709 | 1642 | 1574 |
| LOW-CH4 $\text{CH}_4$ (ppb) | 1842 | 1897 | 1956 | 1917 | 1761 | 1635 | 1536 | 1440 |

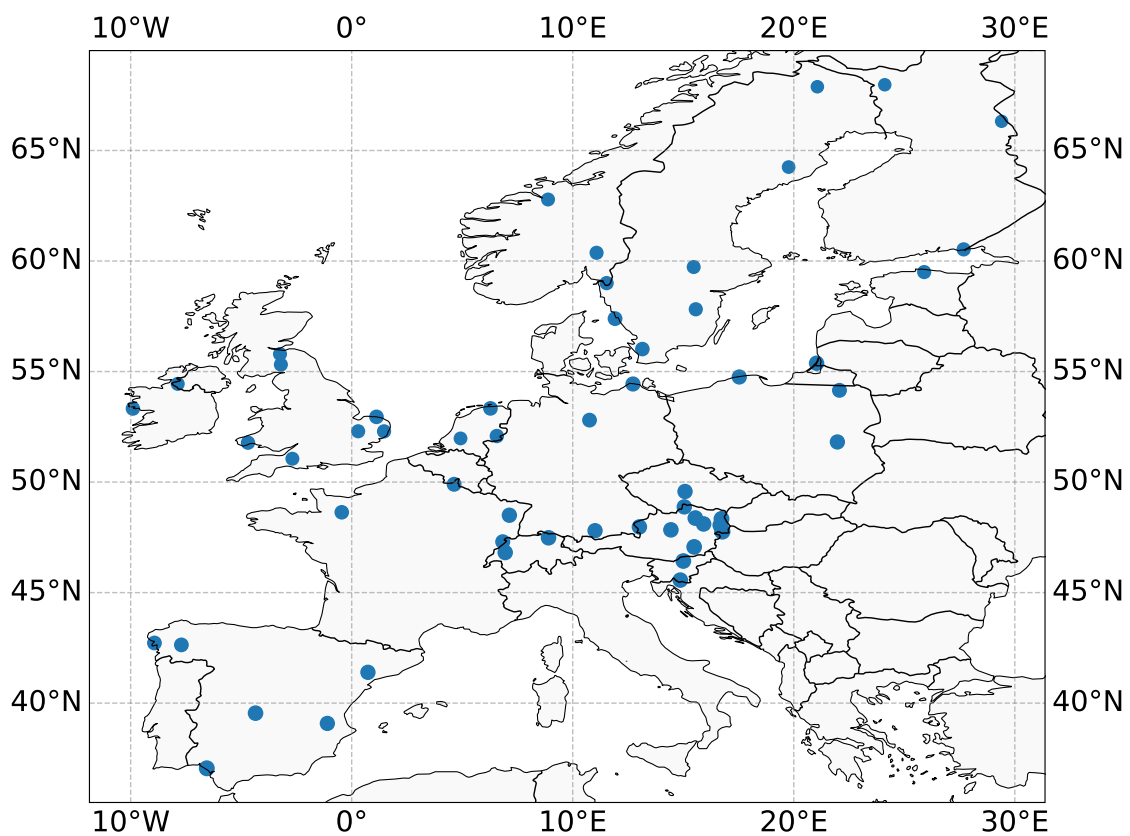

**Figure S2.** Geographical locations of the 56 EBAS stations with peak season MDA8 measurements available for each of the years between 2013-2017, as referred to in Sect. 4.3 of the main text.

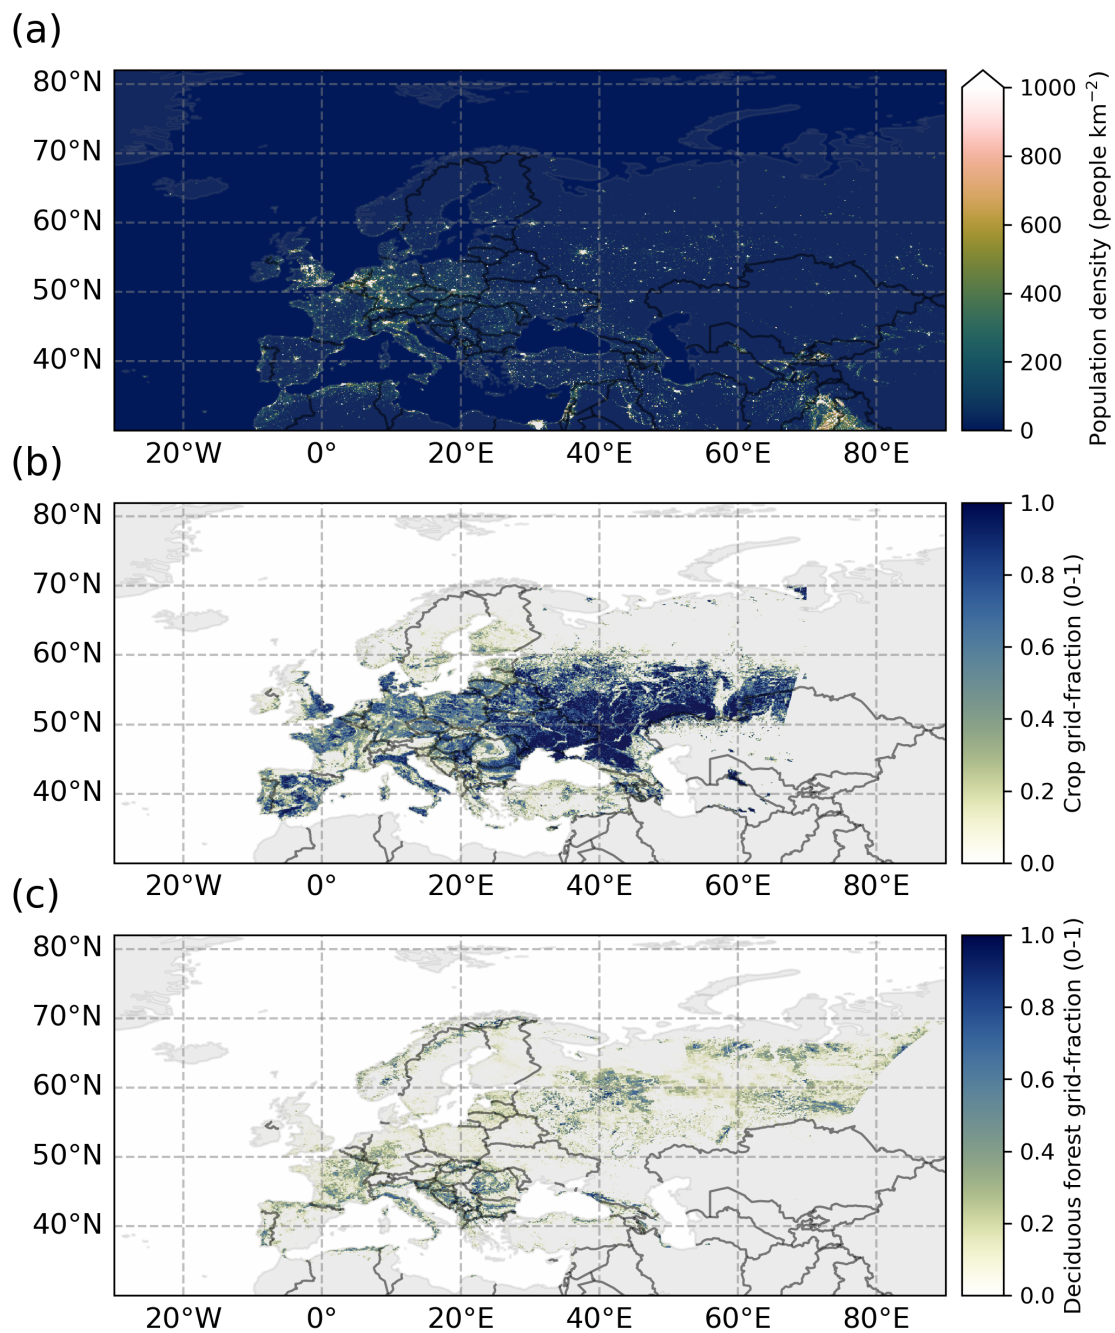

**Figure S3.** Panels (a), (b), and (c) show the population density (people  $\text{km}^{-2}$ ), crop grid-fraction, and deciduous forest grid-fraction, respectively, across the  $0.1^\circ \times 0.1^\circ$  EMEP regional modelling domain. Note the difference in color-scheme for the population density map.

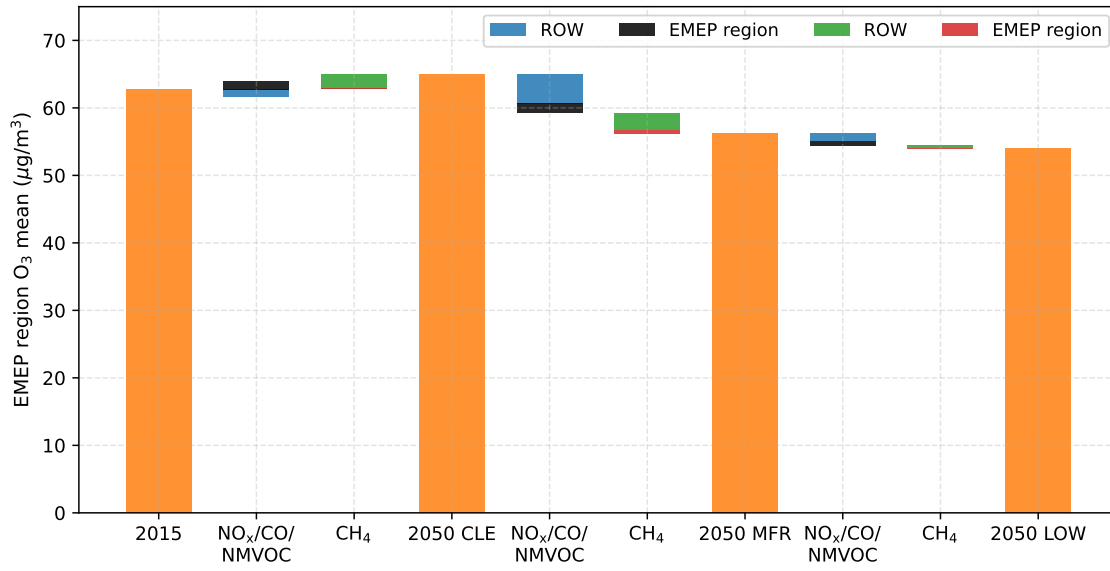

**Figure S4.** Cascade plot of population weighted EMEP region annual mean O<sub>3</sub> concentration changes arising from NO<sub>x</sub>, VOC, and CO emission ('Emis') changes within the EMEP region (black) and ROW (blue), and from background CH<sub>4</sub> changes arising from CH<sub>4</sub> emission changes in the EMEP region (red) and ROW (green), for the 2050 CLE, MFR, and LOW scenarios.

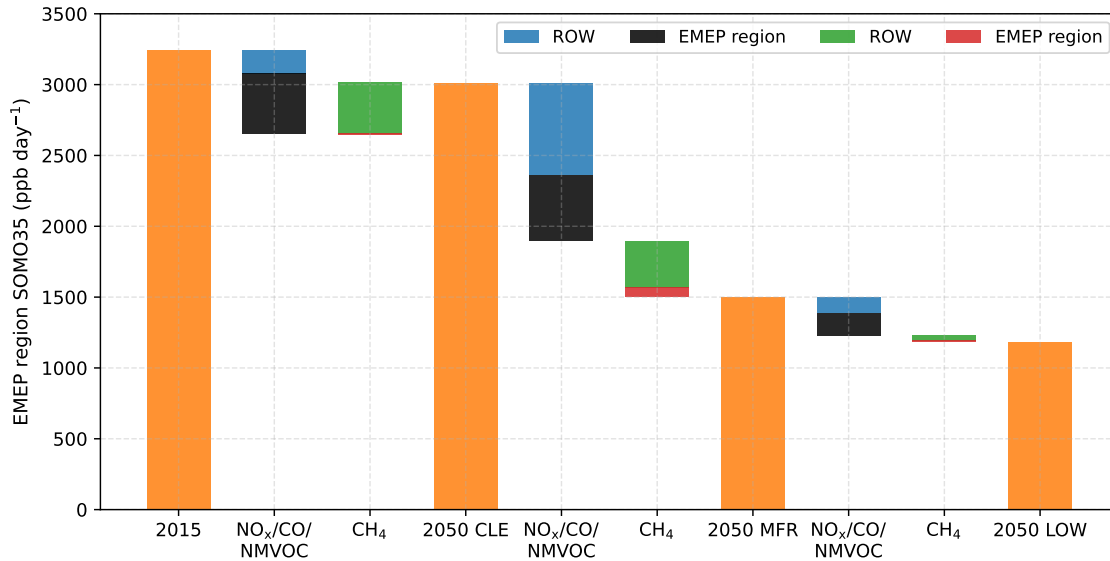

**Figure S5.** Cascade plot of population weighted EMEP region SOMO35 changes arising from NO<sub>x</sub>, VOC, and CO emission ('Emis') changes within the EMEP region (black) and ROW (blue), and from background CH<sub>4</sub> changes arising from CH<sub>4</sub> emission changes in the EMEP region (red) and ROW (green), for the 2050 CLE, MFR, and LOW scenarios.

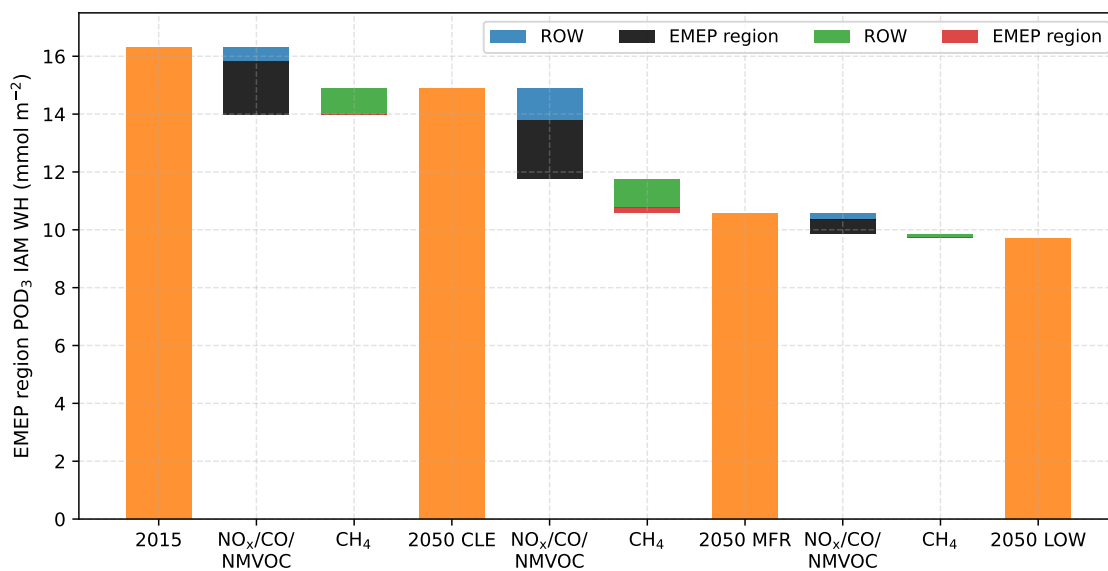

**Figure S6.** Cascade plot of crop-area weighted EMEP region  $\text{POD}_3\text{IAM}_{\text{WH}}$  changes arising from NO<sub>x</sub>, VOC, and CO emission ('Emis') changes within the EMEP region (black) and ROW (blue), and from background CH<sub>4</sub> changes arising from CH<sub>4</sub> emission changes in the EMEP region (red) and ROW (green), for the 2050 CLE, MFR, and LOW scenarios.

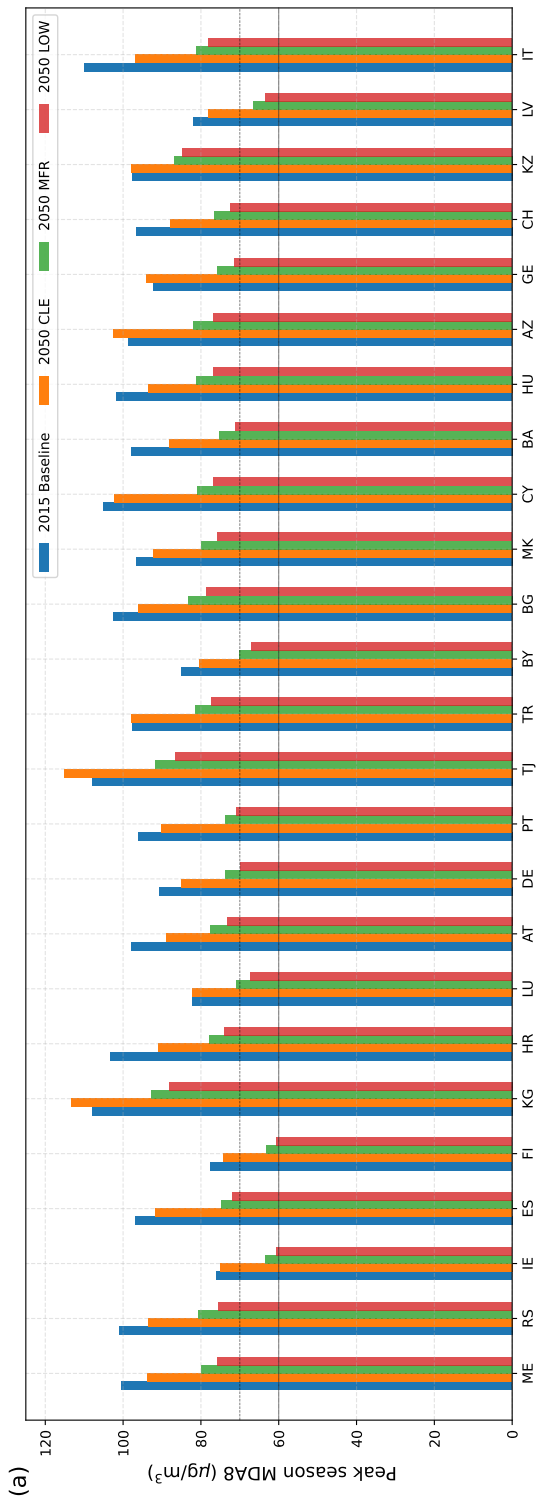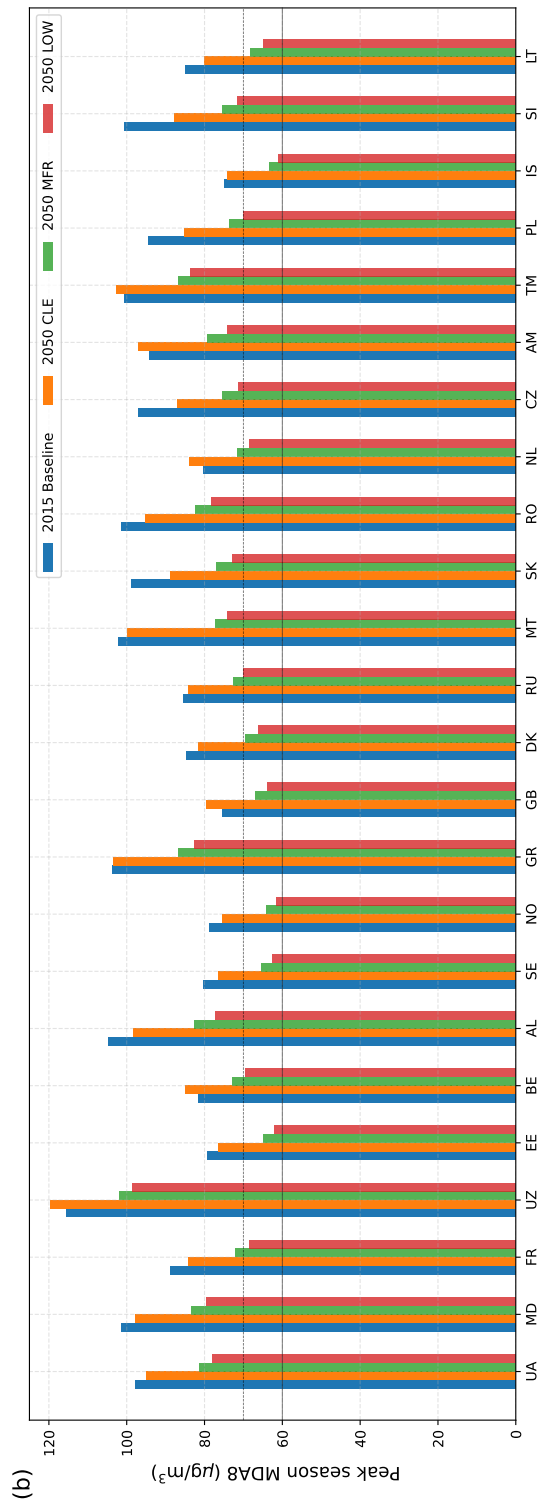

**Figure S7.** Population weighted country average peak season MDA8 concentrations for the 2015 baseline and 2050 CLE, MFR, and LOW scenarios for each of the 49 countries within the EMEP region. Country names are listed using their ISO 3166-1 alpha-2 codes, with the list of countries split between panels (a) and (b) for readability. The horizontal solid black and dashed grey lines indicate the WHO guideline and interim peak season MDA8 limits, respectively.

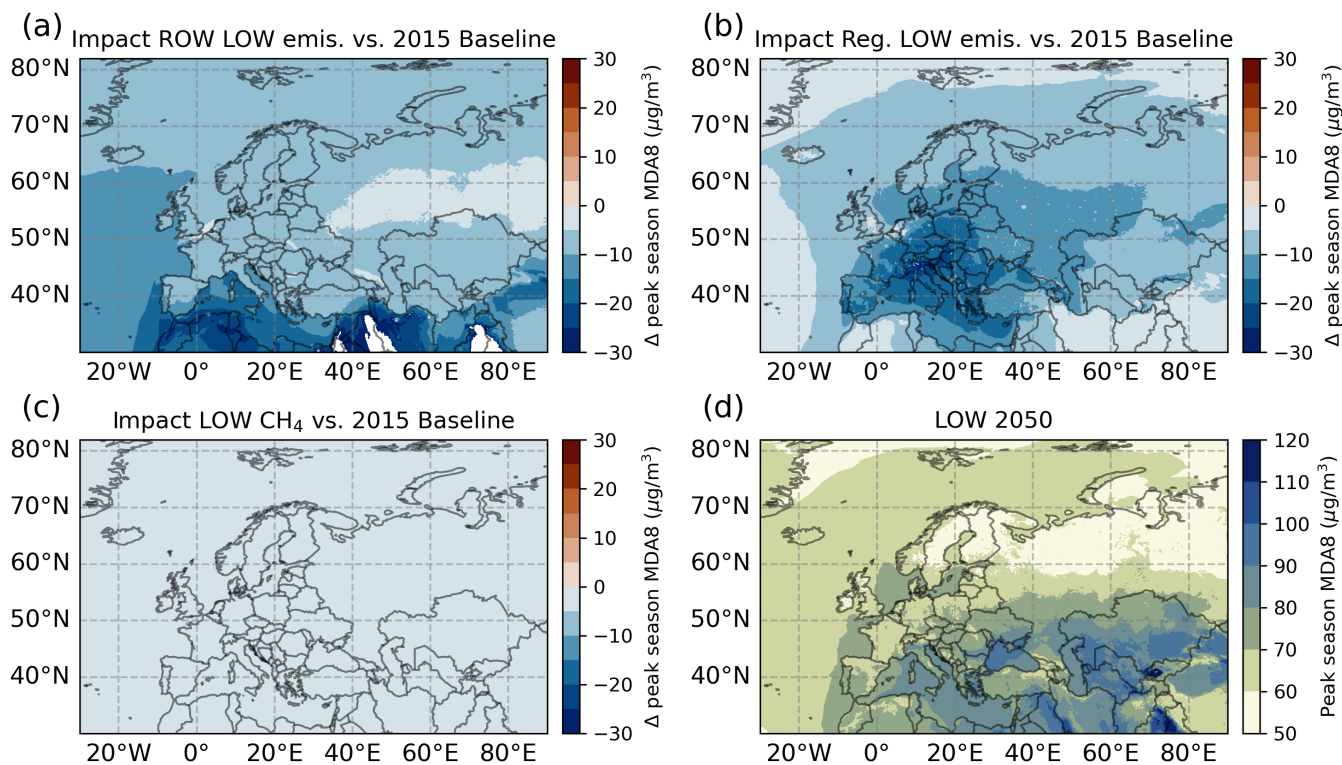

**Figure S8.** Panel (a) shows the reductions in peak season MDA8 achieved by 2050 ROW LOW emissions relative to the 2015 baseline scenario, while panel (b) shows the reductions achieved by EMEP region LOW emissions. Panel (c) shows the reductions achieved by the difference in background CH<sub>4</sub> concentrations between 2050 LOW and 2015 baseline (1574 versus 1834 ppb). Panel (d) shows the peak season MDA8 concentrations simulated for the full 2050 LOW scenario. Note the difference in color-scale for panel (d).



**Table S2.** Absolute and percentage (brackets) changes in health and vegetation O<sub>3</sub> indicators resulting from precursor emission changes in the EMEP (reg.) and ROW regions, and from background CH<sub>4</sub> changes. End values represent the average values at the scenario end-points.

| Scenario                             |                 | 2015 Base to<br>2050 CLE | 2015 Base to<br>2050 MFR <sup>a</sup> | 2015 Base to<br>2050 LOW <sup>a</sup> | 2050 CLE to<br>2050 MFR | 2050 CLE to<br>2050 LOW <sup>a</sup> | 2050 MFR to<br>2050 LOW |
|--------------------------------------|-----------------|--------------------------|---------------------------------------|---------------------------------------|-------------------------|--------------------------------------|-------------------------|
| PS MDA8 <sup>a</sup>                 | Reg. emis       | -3.9 (-4.4 %)            | -9.3 (-10.4 %)                        | -10.7 (-12.0 %)                       | -5.4 (-6.2 %)           | -6.8 (-7.9 %)                        | -1.5 (-2.0 %)           |
|                                      | ROW emis        | -1.6 (-1.8 %)            | -5.5 (-6.2 %)                         | -6.5 (-7.3 %)                         | -4.0 (-4.6 %)           | -4.9 (-5.7 %)                        | -1.0 (-1.3 %)           |
|                                      | CH <sub>4</sub> | 2.8 (3.2 %)              | -1.1 (-1.2 %)                         | -1.6 (-1.8 %)                         | -3.9 (-4.5 %)           | -4.4 (-5.1 %)                        | -0.5 (-0.7 %)           |
|                                      | End value       | 86.6                     | 73.4                                  | 70.5                                  | 73.4                    | 70.5                                 | 70.5                    |
| O <sub>3</sub> mean <sup>a</sup>     | Reg. emis       | -1.5 (-2.2 %)            | -4.5 (-6.7 %)                         | -5.4 (-8.1 %)                         | -3.0 (-4.5 %)           | -3.9 (-5.9 %)                        | -0.9 (-1.6 %)           |
|                                      | ROW emis        | -1.3 (-2.0 %)            | -5.4 (-8.0 %)                         | -6.5 (-9.7 %)                         | -4.1 (-6.1 %)           | -5.2 (-7.8 %)                        | -1.1 (-2.0 %)           |
|                                      | CH <sub>4</sub> | 2.1 (3.1 %)              | -0.8 (-1.2 %)                         | -1.2 (-1.7 %)                         | -2.8 (-4.3 %)           | -3.2 (-4.8 %)                        | -0.4 (-0.7 %)           |
|                                      | End value       | 66.6                     | 56.7                                  | 54.2                                  | 56.7                    | 54.2                                 | 54.2                    |
| 4th MDA8 <sup>a</sup>                | Reg. emis       | -4.4 (-3.0 %)            | -9.6 (-6.7 %)                         | -11.4 (-7.9 %)                        | -5.3 (-3.8 %)           | -7.0 (-5.0 %)                        | -1.7 (-1.3 %)           |
|                                      | ROW emis        | -1.4 (-1.0 %)            | -5.4 (-3.7 %)                         | -6.4 (-4.5 %)                         | -4.0 (-2.8 %)           | -5.0 (-3.5 %)                        | -1.0 (-0.8 %)           |
|                                      | CH <sub>4</sub> | 2.6 (1.8 %)              | -0.9 (-0.6 %)                         | -1.4 (-1.0 %)                         | -3.5 (-2.5 %)           | -4.0 (-2.8 %)                        | -0.5 (-0.4 %)           |
|                                      | End value       | 140.6                    | 127.8                                 | 124.6                                 | 127.8                   | 124.6                                | 124.6                   |
| JJA O <sub>3</sub> max <sup>c</sup>  | Reg. emis       | -4.7 (-4.8 %)            | -11.0 (-11.3 %)                       | -12.6 (-12.9 %)                       | -6.3 (-6.7 %)           | -7.9 (-8.3 %)                        | -1.6 (-2.0 %)           |
|                                      | ROW emis        | -1.4 (-1.5 %)            | -4.7 (-4.8 %)                         | -5.3 (-5.5 %)                         | -3.2 (-3.4 %)           | -3.9 (-4.1 %)                        | -0.7 (-0.8 %)           |
|                                      | CH <sub>4</sub> | 3.4 (3.5 %)              | -1.2 (-1.3 %)                         | -1.9 (-1.9 %)                         | -4.6 (-4.9 %)           | -5.3 (-5.6 %)                        | -0.6 (-0.8 %)           |
|                                      | End value       | 94.8                     | 80.6                                  | 77.6                                  | 80.6                    | 77.6                                 | 77.6                    |
| JJA O <sub>3</sub> mean <sup>a</sup> | Reg. emis       | -3.3 (-4.5 %)            | -7.8 (-10.6 %)                        | -8.9 (-12.2 %)                        | -4.5 (-6.3 %)           | -5.6 (-7.8 %)                        | -1.1 (-1.8 %)           |
|                                      | ROW emis        | -1.2 (-1.6 %)            | -3.9 (-5.3 %)                         | -4.5 (-6.1 %)                         | -2.7 (-3.8 %)           | -3.3 (-4.6 %)                        | -0.6 (-0.9 %)           |
|                                      | CH <sub>4</sub> | 2.7 (3.7 %)              | -1.0 (-1.4 %)                         | -1.5 (-2.1 %)                         | -3.7 (-5.2 %)           | -4.2 (-5.9 %)                        | -0.5 (-0.8 %)           |
|                                      | End value       | 71.7                     | 60.7                                  | 58.5                                  | 60.7                    | 58.5                                 | 58.5                    |
| SOMO35 <sup>b</sup>                  | Reg. emis       | -373 (-12.3 %)           | -860 (-28.3 %)                        | -981 (-32.3 %)                        | -486 (-17.4 %)          | -608 (-21.7 %)                       | -121 (-8.6 %)           |
|                                      | ROW emis        | -179 (-5.9 %)            | -733 (-24.1 %)                        | -838 (-27.6 %)                        | -553 (-19.8 %)          | -658 (-23.6 %)                       | -104 (-7.4 %)           |
|                                      | CH <sub>4</sub> | 307 (10.1 %)             | -33 (-1.1 %)                          | -74 (-2.4 %)                          | -341 (-12.2 %)          | -381 (-13.7 %)                       | -40 (-2.9 %)            |
|                                      | End value       | 2795                     | 1413                                  | 1147                                  | 1413                    | 1147                                 | 1147                    |

<sup>a</sup>Area weighted EMEP region average in  $\mu\text{g m}^{-3}$ . <sup>b</sup>Area weighted EMEP region average in  $\text{ppb day}^{-1}$ . <sup>c</sup>Area weighted average converted from ppb to using the standard-atmosphere O<sub>3</sub> conversion factor of 1.96.
